# Supplementary material for: Palladium-Catalyzed Multicomponent Synthesis of 2-Imidazolines from Imines and Acid Chlorides
Source: Molecules. 2012 Nov 22;17(12):13759–68. doi: 10.3390/molecules171213759 (PMC6269033; doi:10.3390/molecules171213759)

## Supplementary Information

**Figure S1.**  $^1\text{H}$ -NMR of compound **3a**.

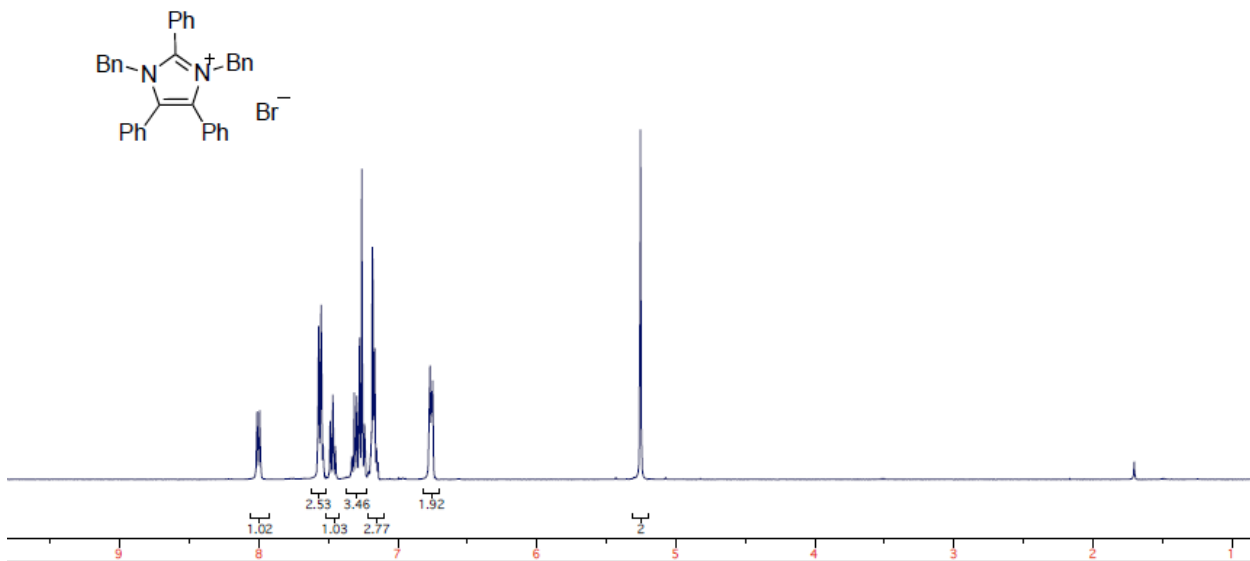

**Figure S2.**  $^{13}\text{C}$ -NMR of compound **3a**.

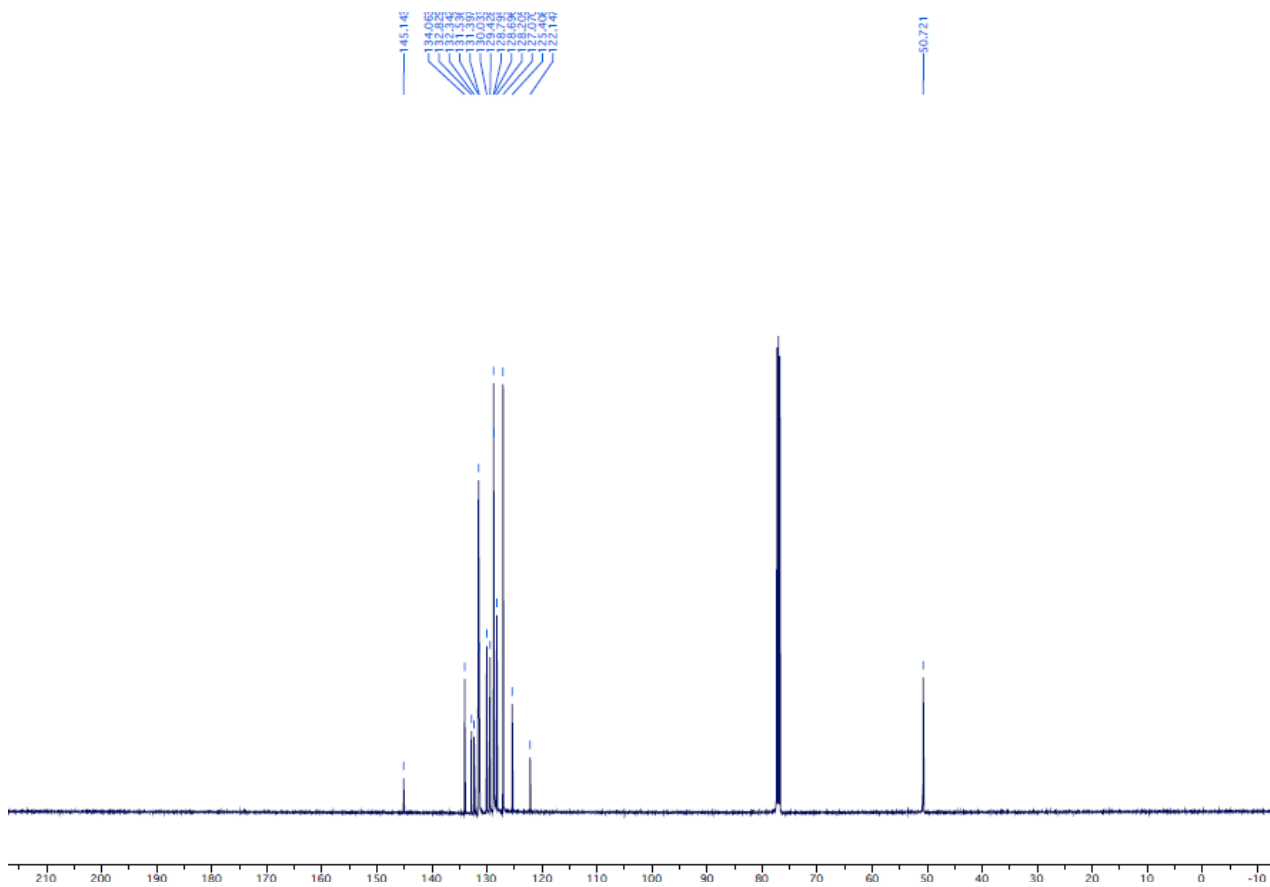

**Figure S3.**  $^1\text{H}$ -NMR of compound **4b**.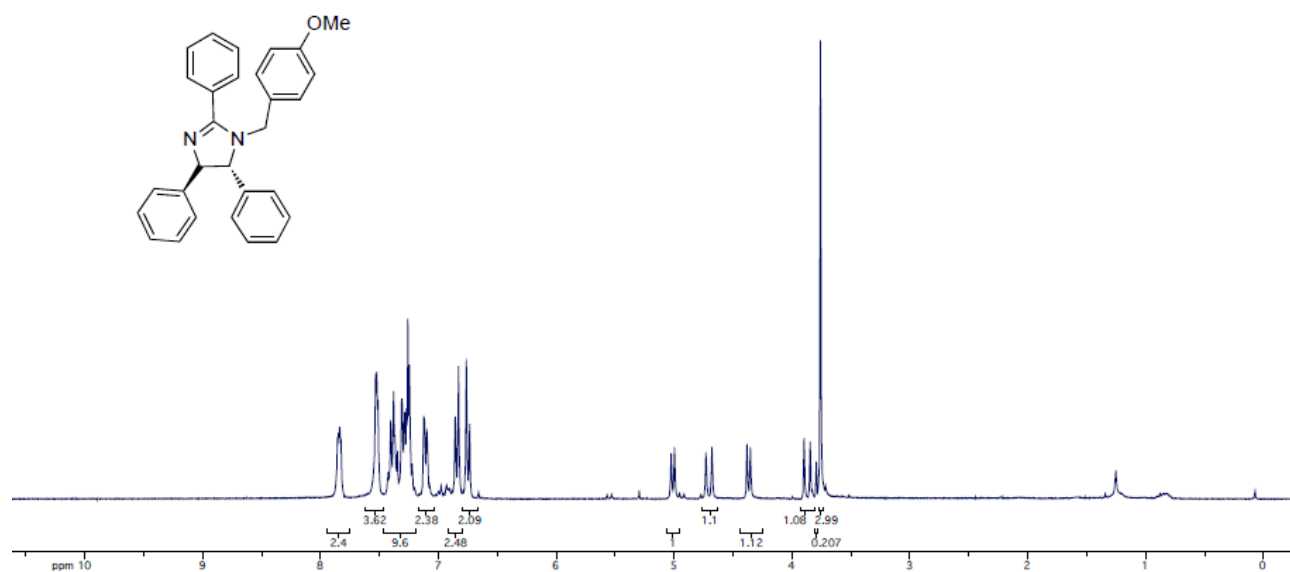**Figure S4.**  $^{13}\text{C}$ -NMR of compound **4b**.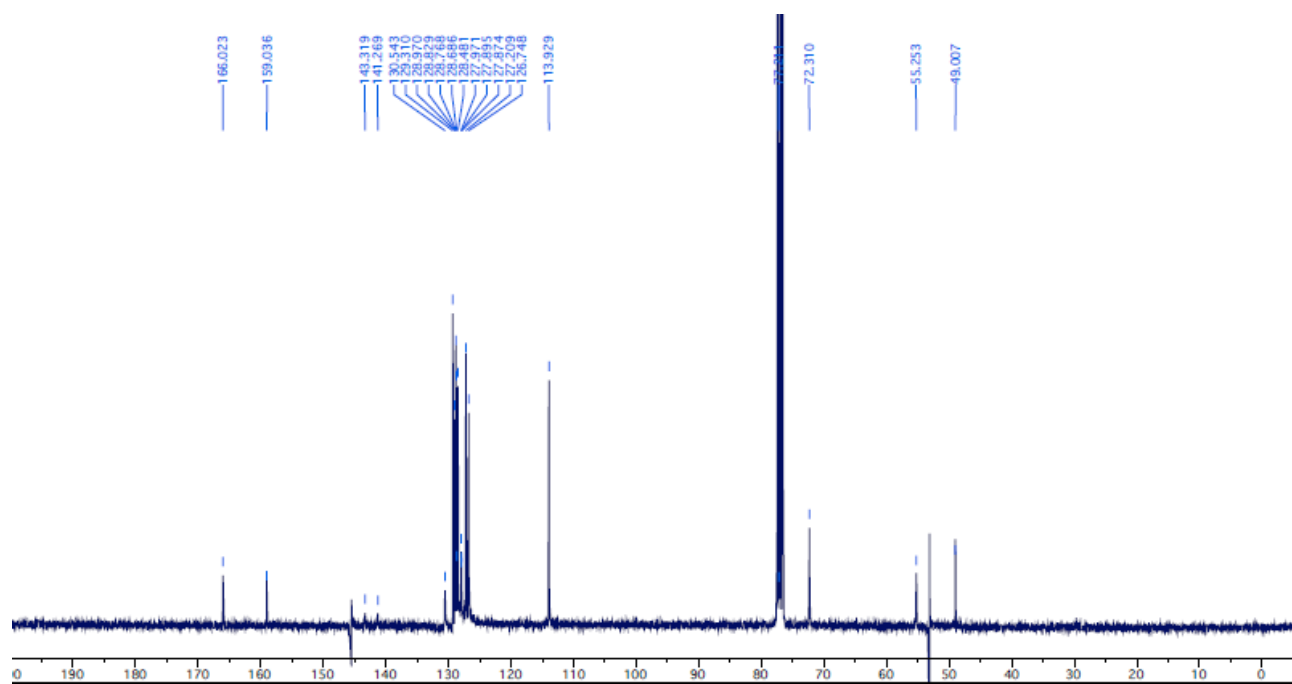

**Figure S5.**  $^1\text{H}$ -NMR of compound **5b**.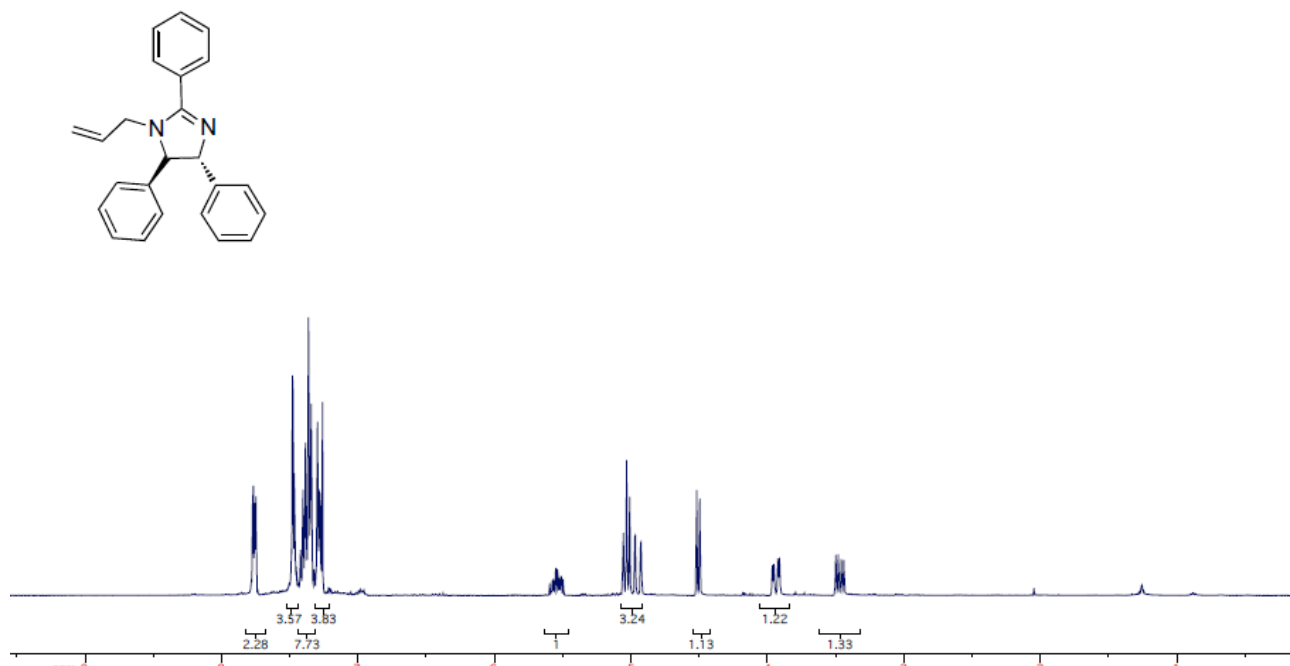**Figure S6.**  $^{13}\text{C}$ -NMR of compound **5b**.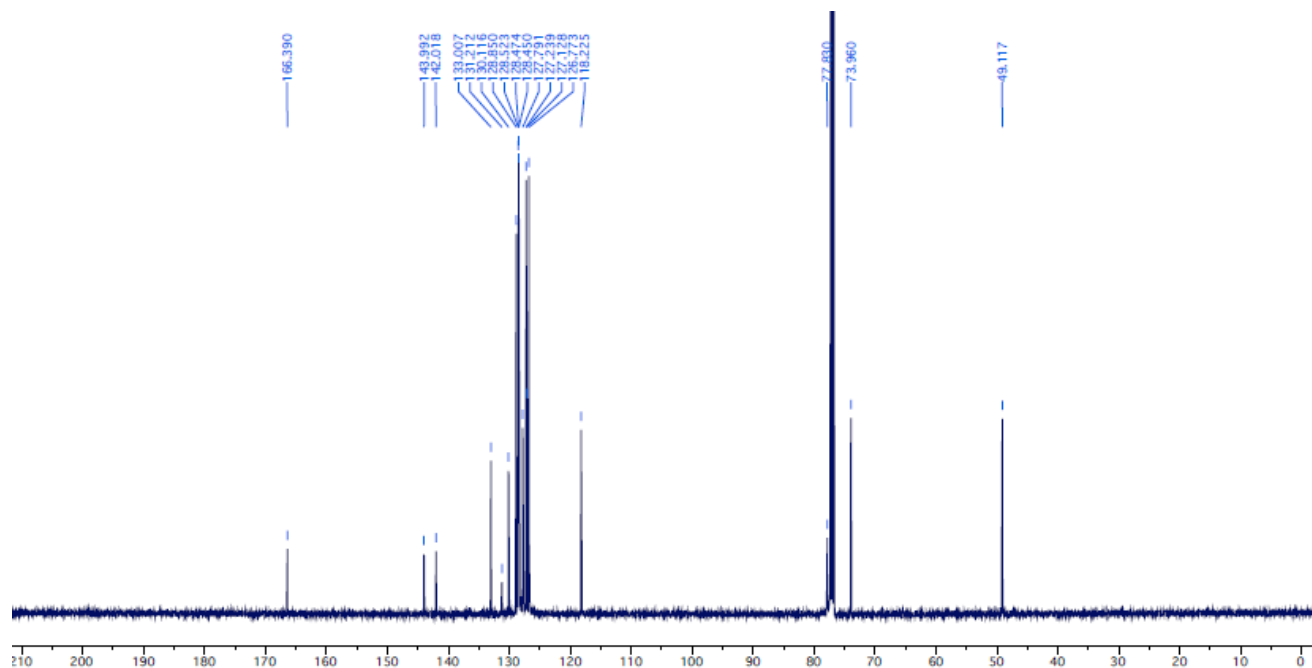

**Figure S7.**  $^1\text{H}$ -NMR of compound **4c**.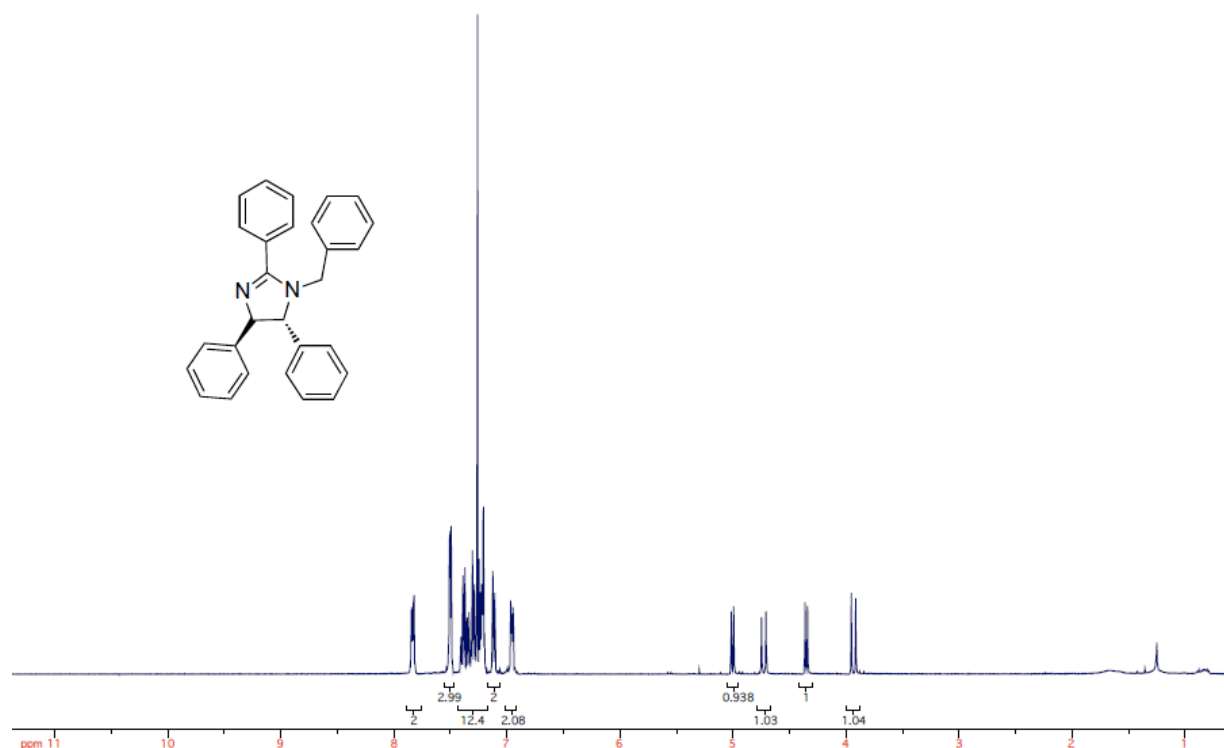**Figure S8.**  $^{13}\text{C}$ -NMR of compound **4c**.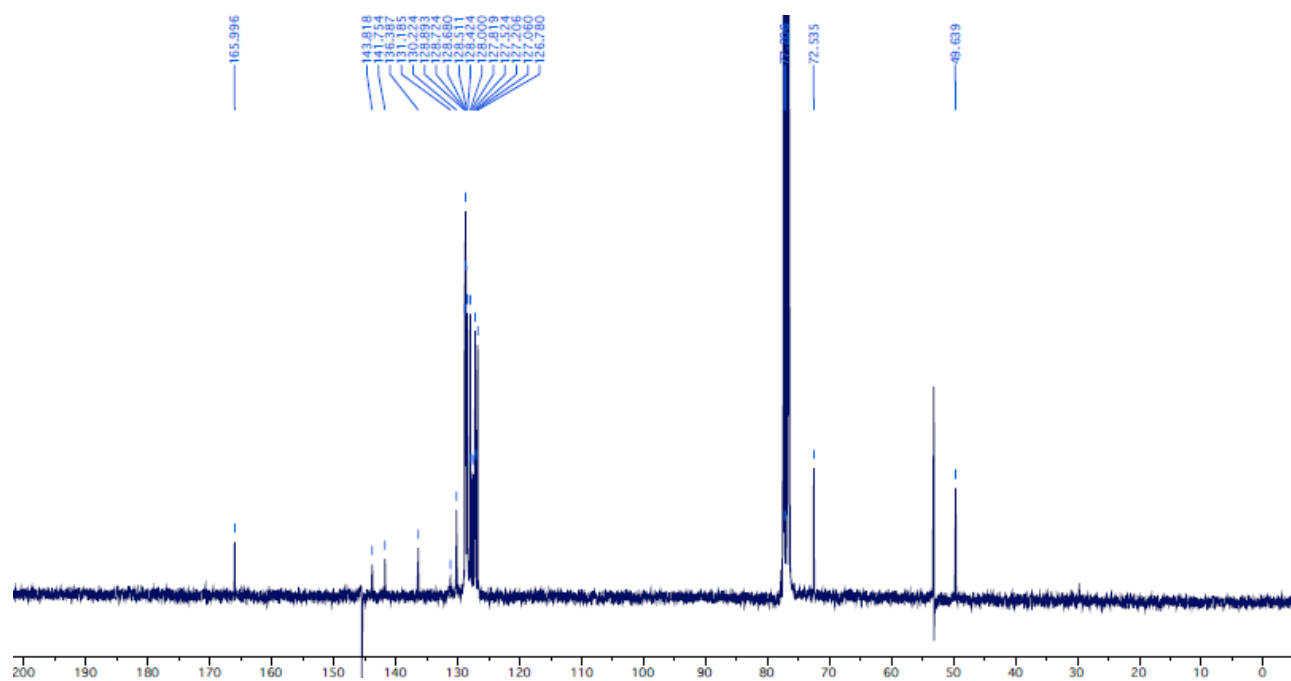

**Figure S9.**  $^1\text{H}$ -NMR of compound **4d**.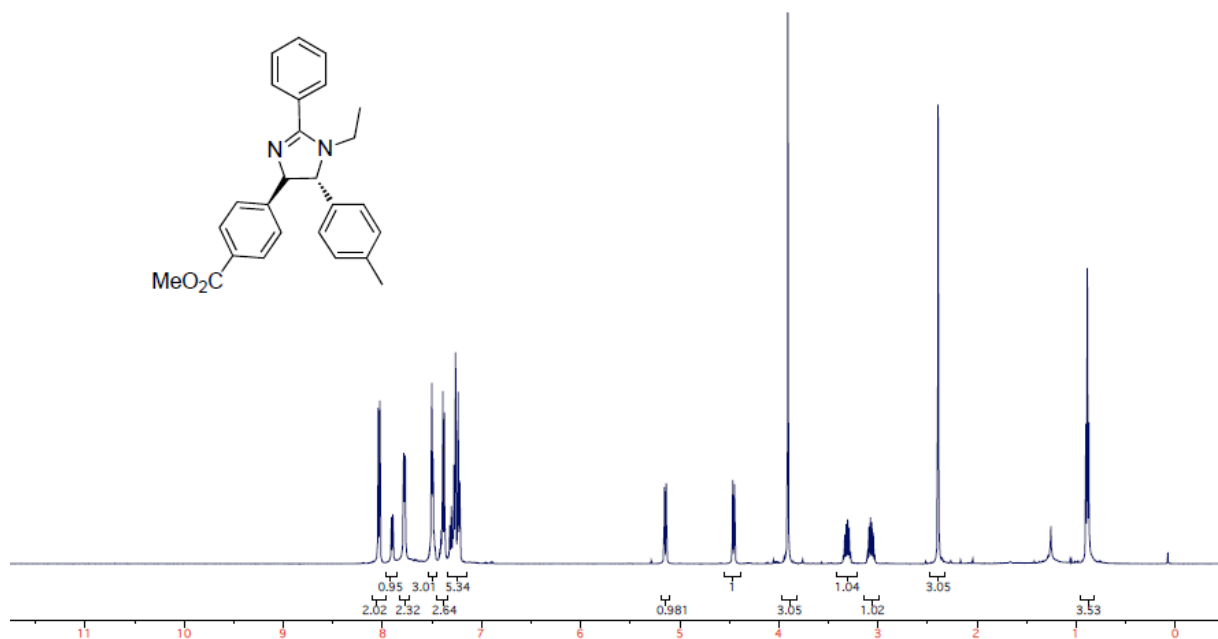**Figure S10.**  $^{13}\text{C}$ -NMR of compound **4d**.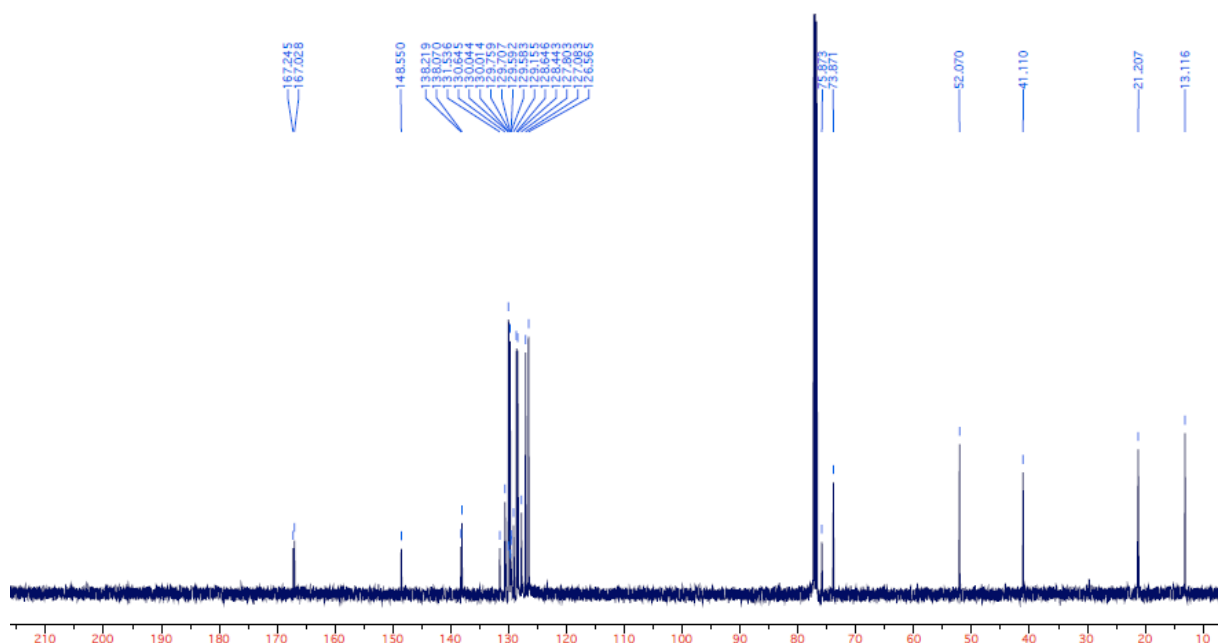

**Figure S11.**  $^1\text{H}$ -NMR of compound **4e**.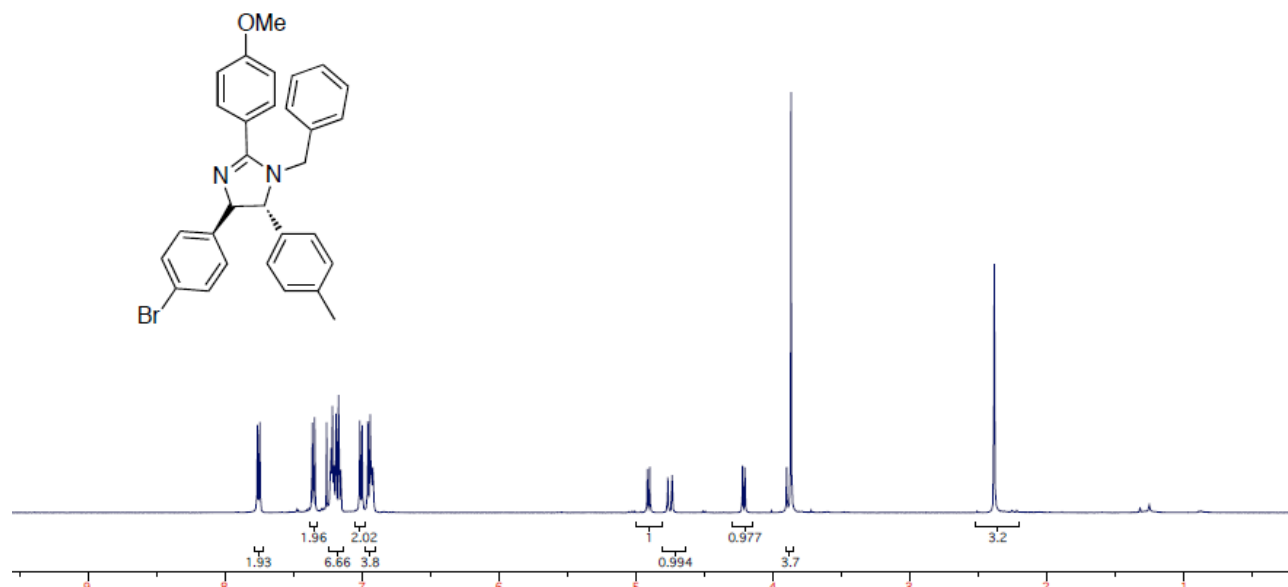**Figure S12.**  $^{13}\text{C}$ -NMR of compound **4e**.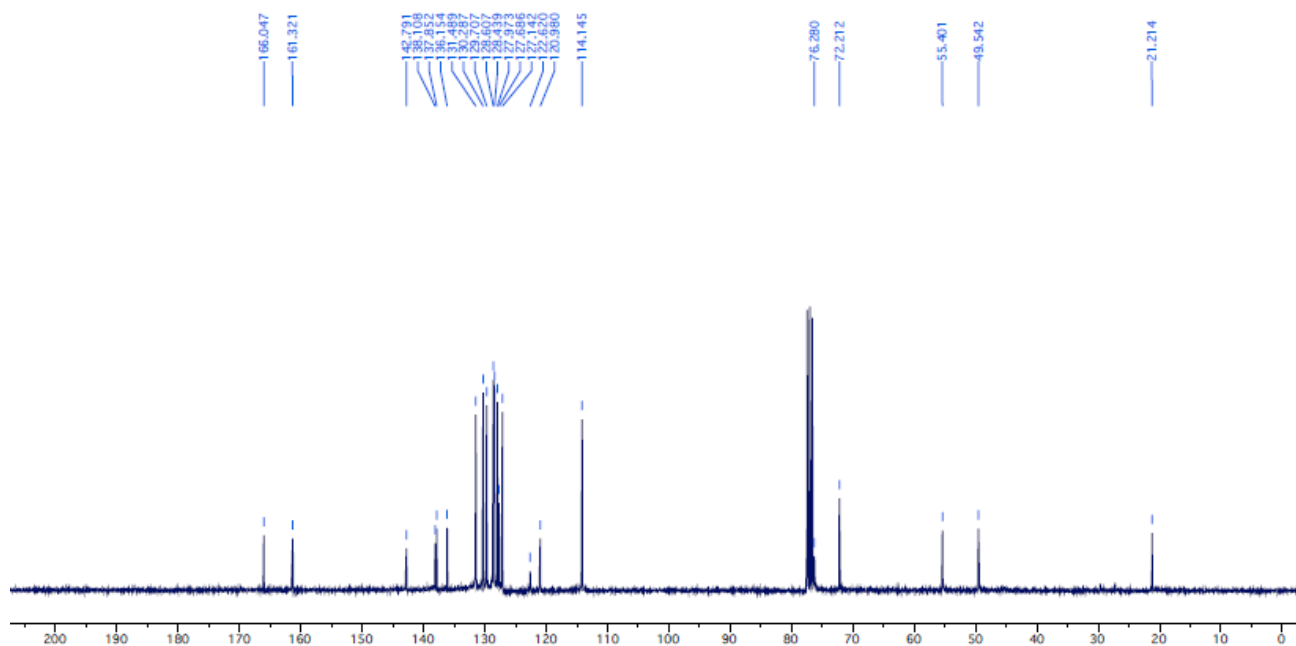

Supplement: Supplementary file 1 [file molecules-17-13759-s001.pdf]
